# Supplementary material for: Nanogels with tailored hydrophobicity and their behavior at air/water interfaces
Source: Royal Society of Chemistry journal article supplement (doi:10.1039/d4sm01186d), 2024-11-27
Supplement: d4sm01186d1.pdf [file d4sm01186d1.pdf]

# ESI: Nanogels with tailored hydrophobicity and their behavior at air/water interfaces

Ruiguang Cui<sup>1, †</sup>, Maret Ickler<sup>2, †</sup>, Johannes Harrer<sup>2</sup>, Nicolas Vogel<sup>2, \*</sup>, Daniel Klinger<sup>1, \*</sup>

<sup>†</sup> co-first authorship

<sup>1</sup> Freie Universität Berlin, Institute of Pharmacy, Königin-Luise-Str. 2-4,  
14197 Berlin, Germany

<sup>2</sup> Friedrich-Alexander-Universität Erlangen-Nürnberg, Institute of Particle Technology  
91058 Erlangen, Germany

\* corresponding author: [daniel.klinger@fu-berlin.de](mailto:daniel.klinger@fu-berlin.de), [nicolas.vogel@fau.de](mailto:nicolas.vogel@fau.de)

## Contents:

**Figure S1.** Reaction scheme and structure characterization of nanogels.

**Figure S2.** Nanogel size distribution calculated from TEM images.

**Figure S3.** Hydrophobicity differences of nanogels as verified by solubility differences of the corresponding polymers.

**Figure S4.** AFM height images of nanogel and cavities after removal of nanogels on PDMA gel matrices.

**Figure S5.** Nearest neighbor distance (NND) distribution of PROPA0 nanogels with increasing surface pressure.

**Figure S6.** AFM phase image of PROPA0 after deposited on a solid substrate from the air/water interface.

**Figure S7.** SEM images of nanogels transferred to silicon water from air/water interface under various surface pressure.

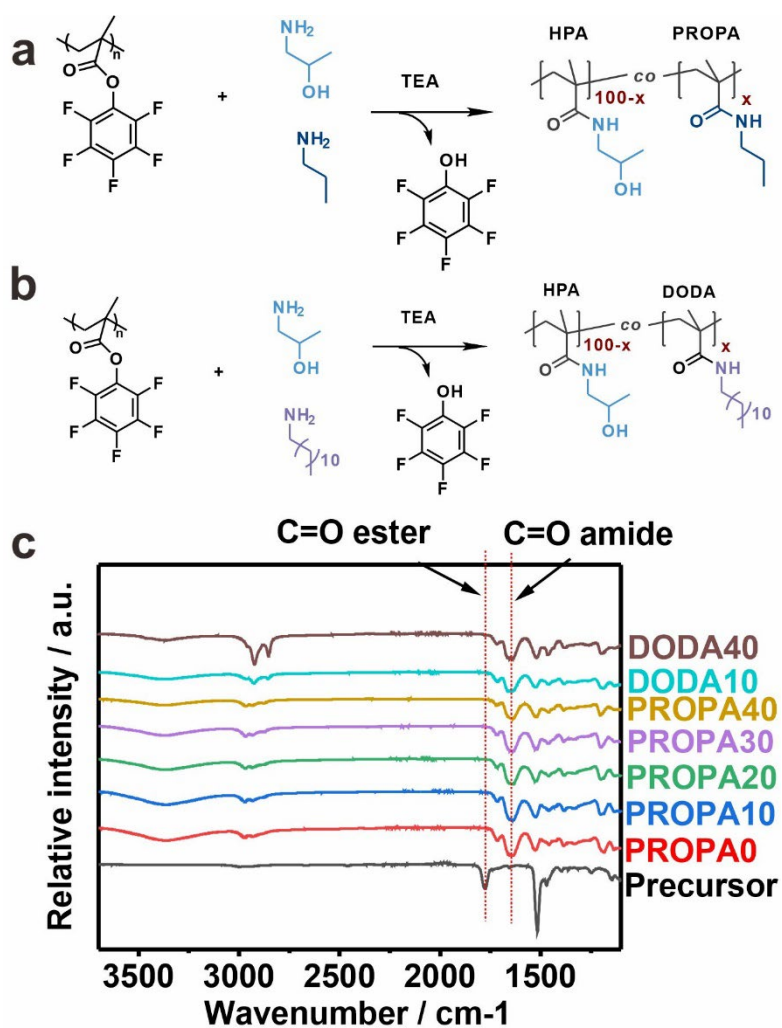

26

27 **Figure S1.** (a – b) Reaction scheme to prepare PROPAs and DODAs nanogels via post-  
 28 functionalization of reactive ester precursor nanoparticles. (c) FT-IR spectra verify the  
 29 complete conversion of reactive esters of the precursor particles to amide bonds of the  
 30 functionalized particles.

31

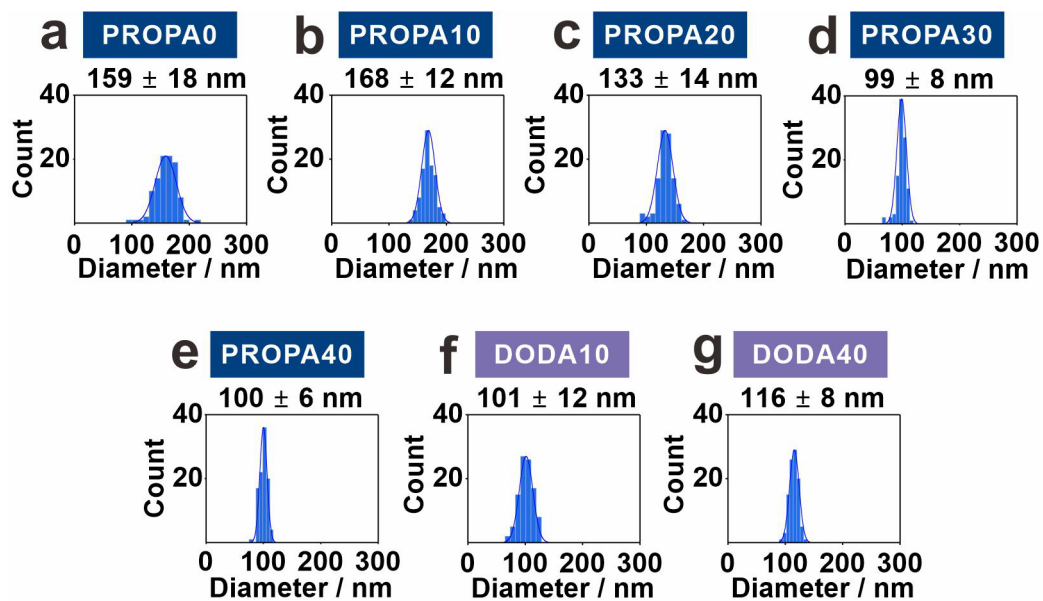

32

33 **Figure S2.** (a-e) Nanogel size distribution calculated from TEM images: PROPA0 to PROPA40,  
 34 respectively; (f) DODA10 and (g) DODA40.

35

36

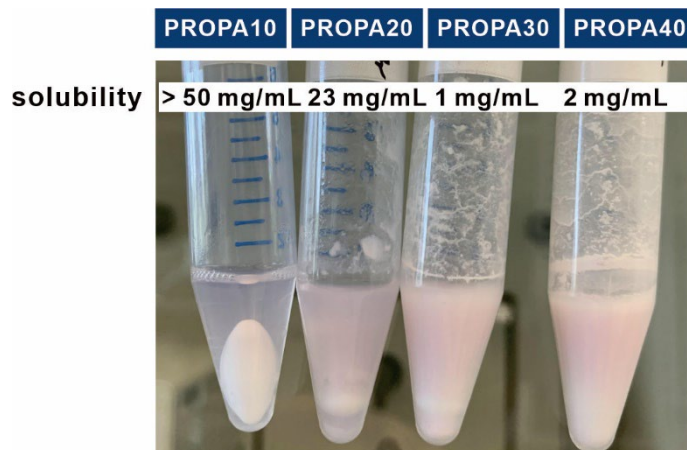

37

38 **Figure S3.** Solubility differences of PROPA10 to PROPA40 polymers verify their  
 39 hydrophobicity differences.

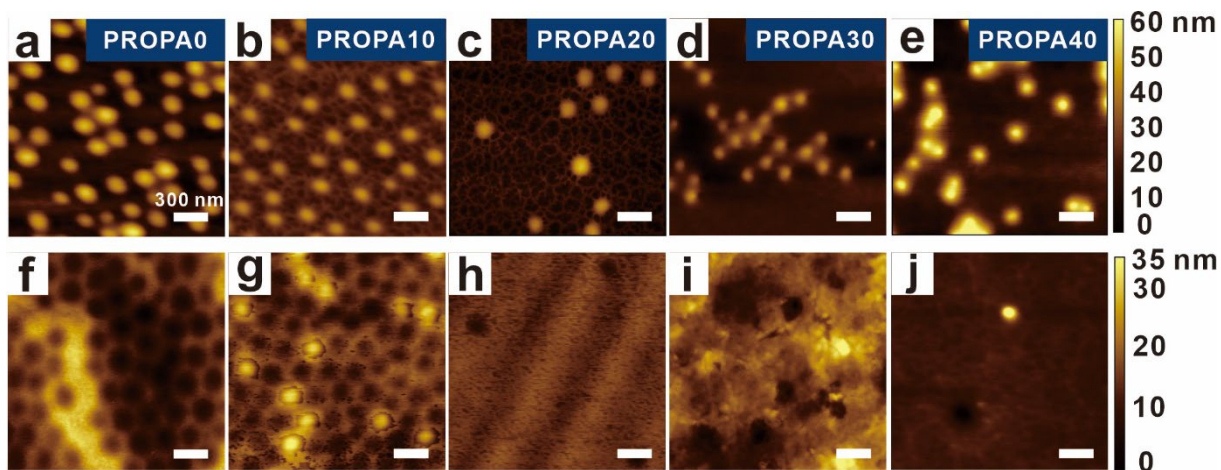

40

41 **Figure S4.** (a – e) AFM height images of PROPANANOGEL – PROPANANOGEL40 nanogel on PDMA gel matrices,  
 42 indicating the protrusion of nanogels in the water phase. (f – j) AFM height images of cavities  
 43 after removing the PROPANANOGEL0 – PROPANANOGEL40 nanogel from the PDMA gel matrices, indicating the  
 44 protrusion of nanogels in the air phase. The scale bars are 300 nm for all images.

45

46

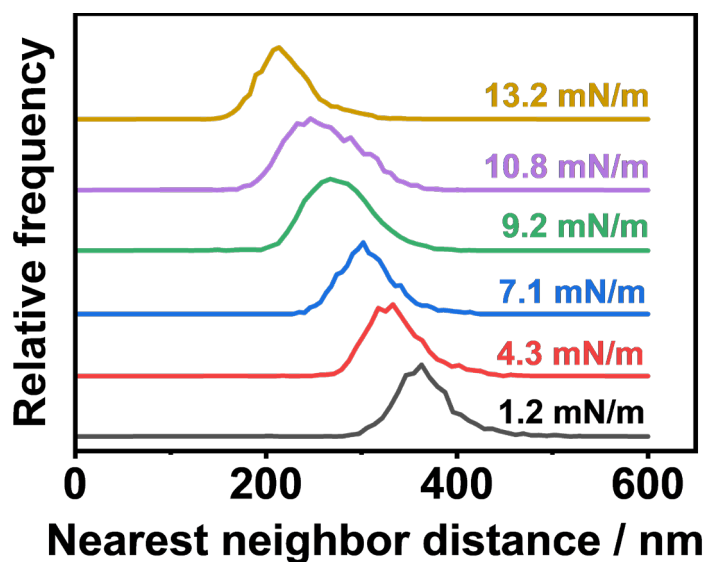

47

48 **Figure S5.** Nearest neighbor distance (NND) distribution of PROPANANOGEL0 nanogels with increasing  
 49 surface pressure, showing a continuous transition towards smaller interparticle distances.

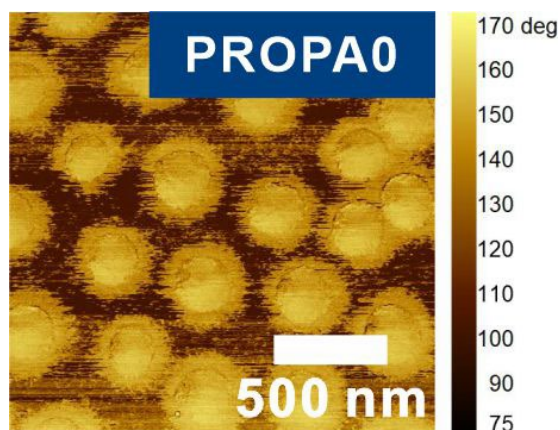

50

51 **Figure S6.** AFM phase image of PROPA0 which shows a thin corona after deposited on a solid  
52 substrate from the air/water interface.

53

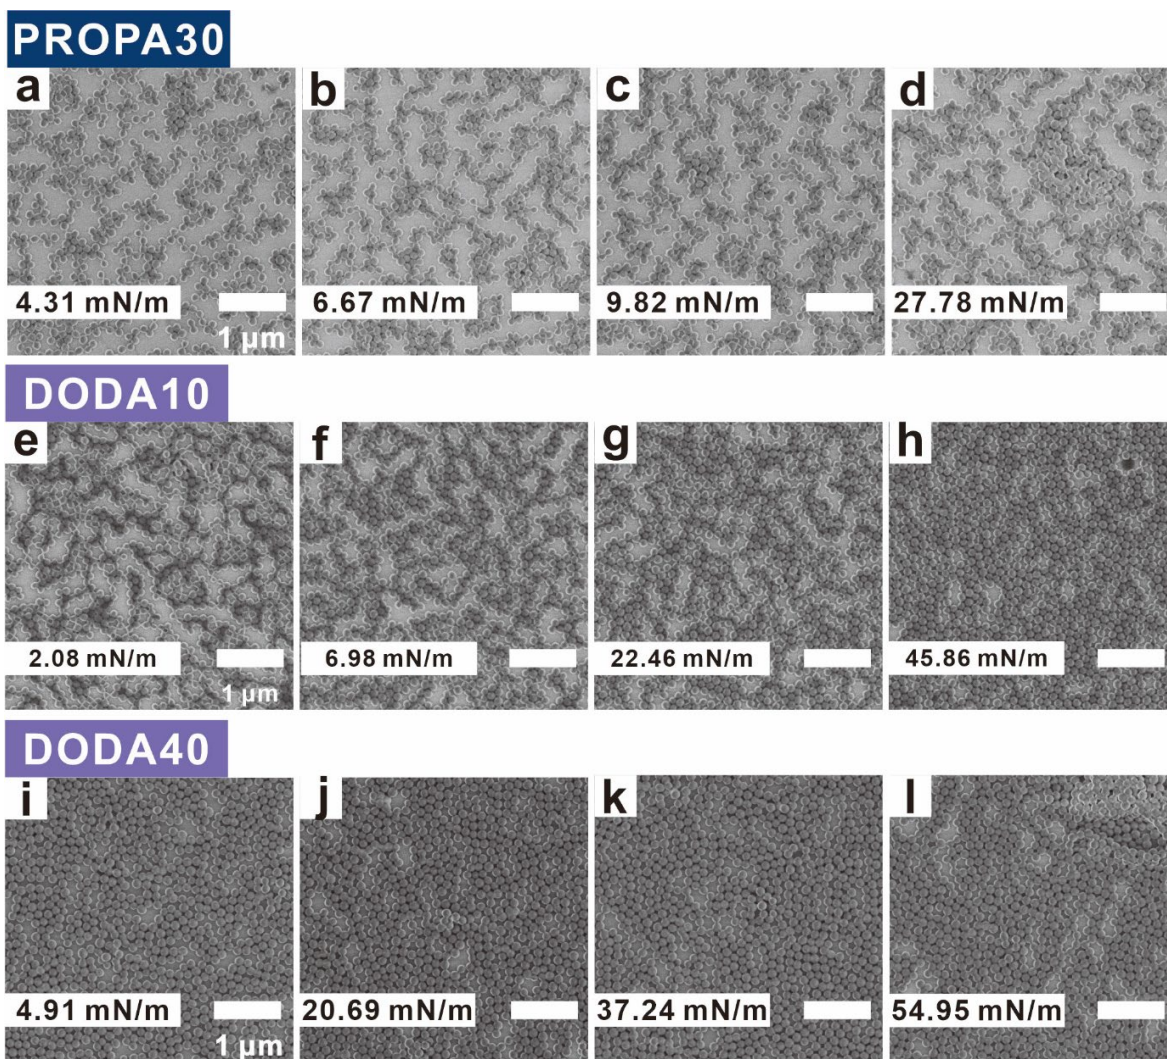

54

55 **Figure S7.** SEM images of nanogels transferred to silicon water from air/water interface under  
56 various surface pressure: (a – d) PROPA30, (e – h) DODA10 and (i – l) DODA40.
